# Supplementary material
Source: Springer Nature journal article supplement (https://www.springermedizin.de/resource/supplementary/12961_2008_80_MOESM2_ESM.pdf/9571432)

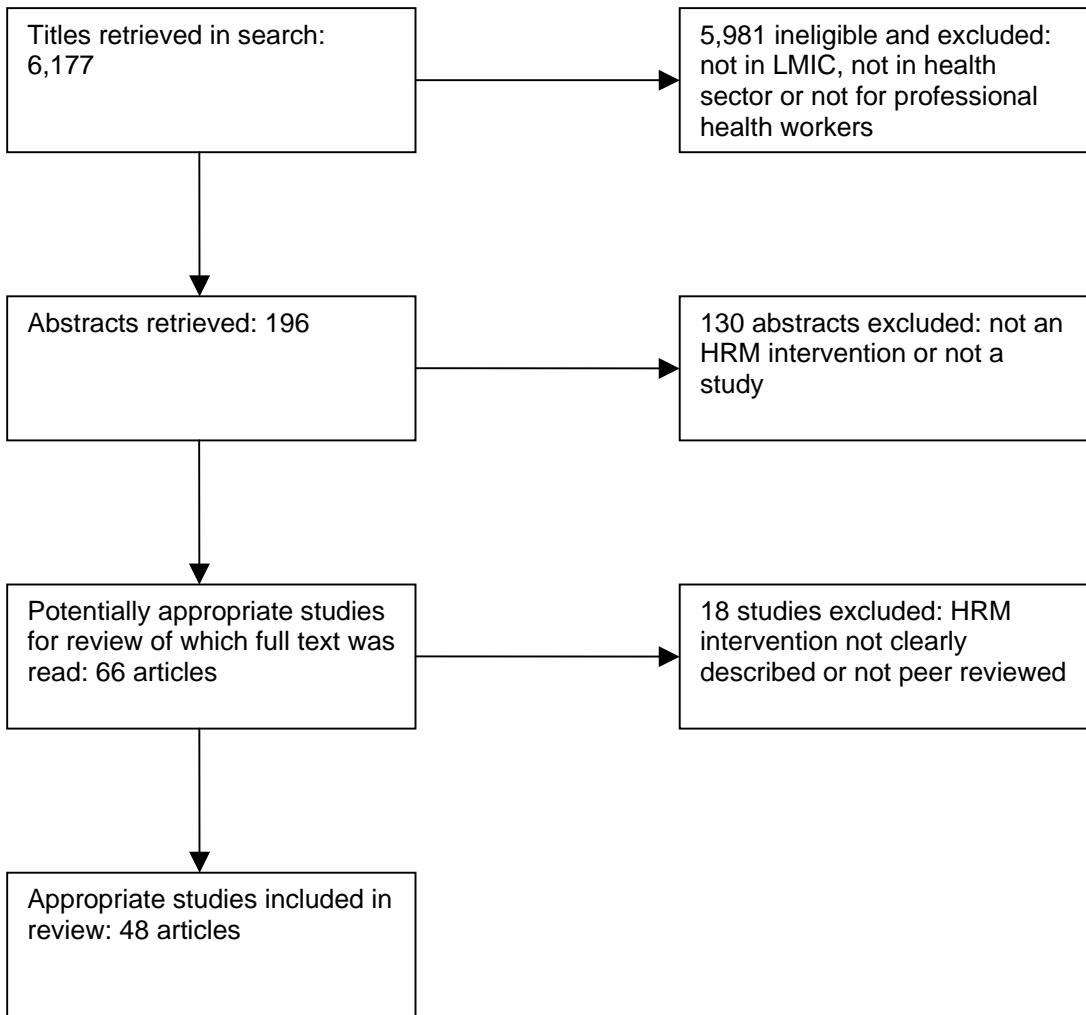

Supplement: MOESM2 [file 9571432]
